# Supplementary material
Source: PubMed Central journal article supplement (PMC7536048)
Supplement: rsif20200091supp1.pdf [file rsif20200091supp1.pdf]

## 1 Supplementary Figures

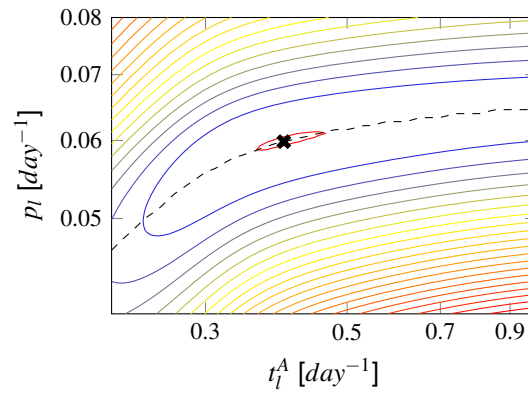

Figure S1: Identifiability analysis for leukemic proliferation rate  $p_l$  and leukemic activation rate  $t_l^A$  using the profile likelihood.  $\mathbf{x}$  indicates starting parameter combination. The red line close to the  $\mathbf{x}$  indicates the identifiability threshold.

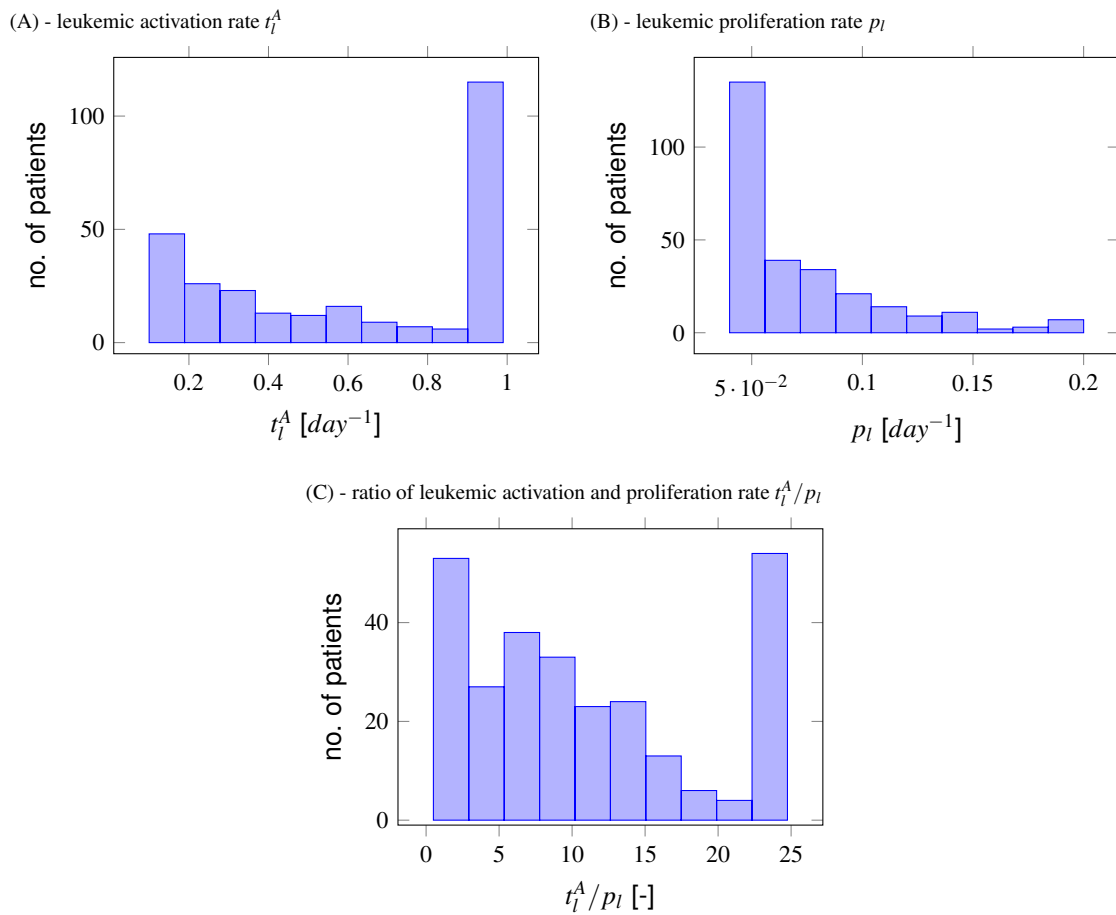

Figure S2: Distribution of leukemic activation rates, leukemic proliferation rates and ratio of leukemic activation and proliferation in the patient cohort.

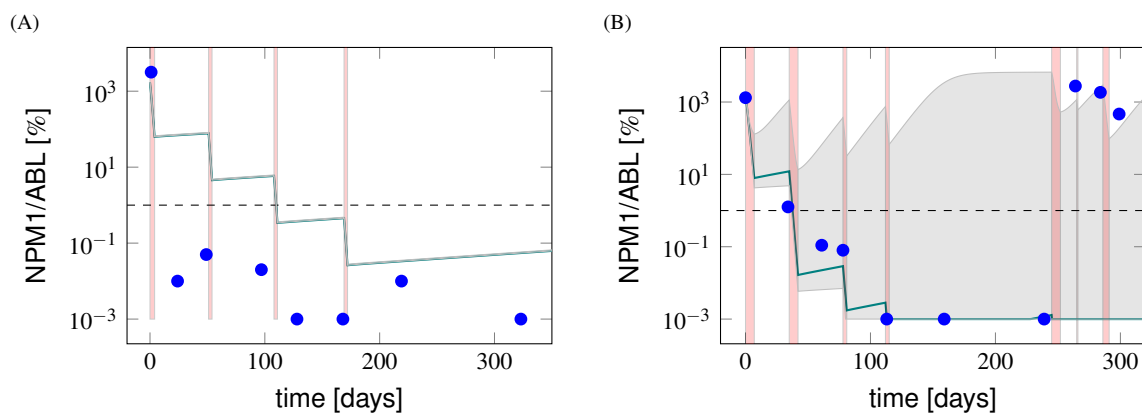

Figure S3: Example time courses with model fit of two patients that the model could not fit adequately.

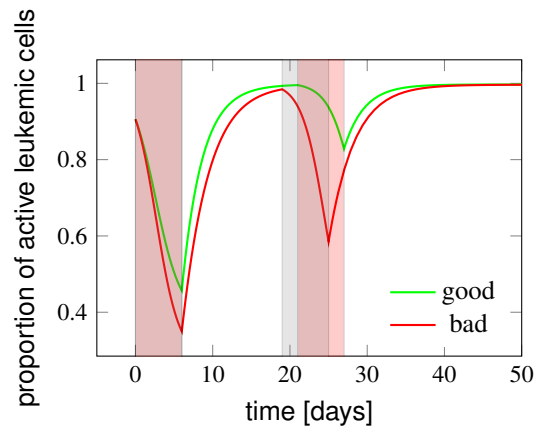

Figure S4: Proportion of active cells within the leukemic cell population for a good therapy responder example patient (PatientID = 3137, therapy marked red) and a bad therapy responder example patient (PatientID = 104, therapy times marked gray). Data and model fit can be found in Figure 2.

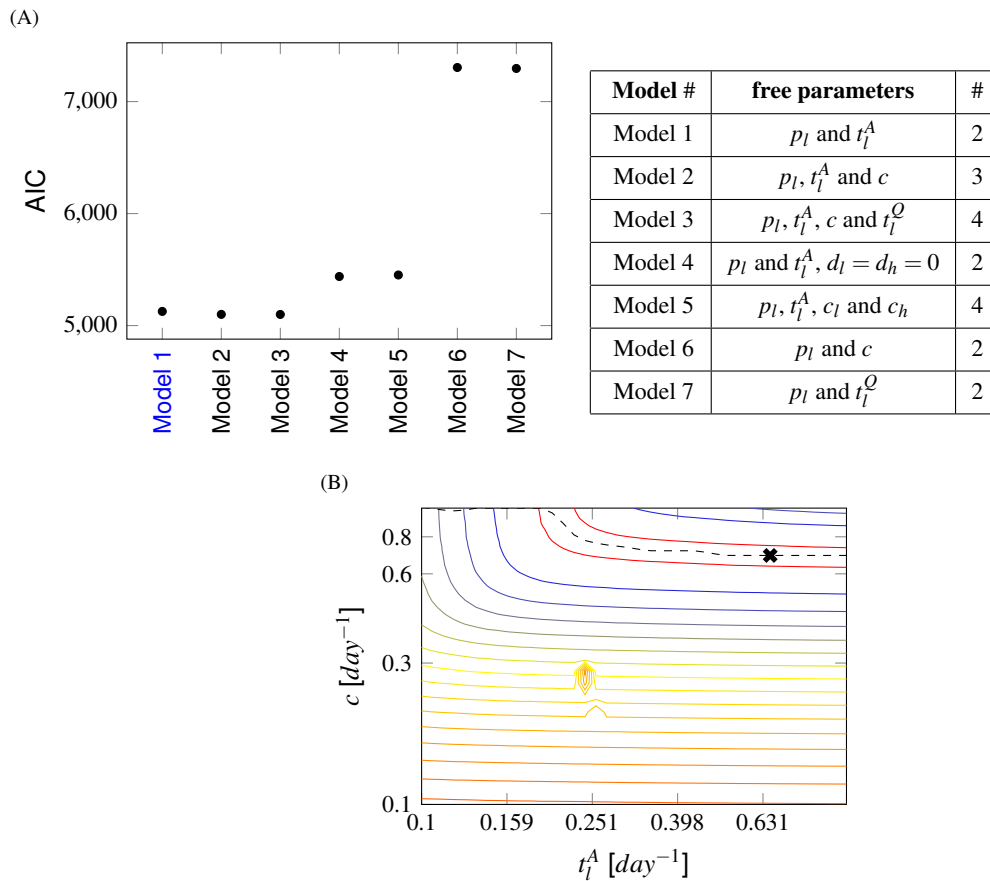

Figure S5: **A** Comparison of 7 different nested models using the Akaike information criterion (AIC), once computed for each individual patient and once for the entire population using the Monolix software (©Lixoft). Model 1: the model used throughout the paper, with 2 free parameters:  $p_l$  and  $t_l^A$ . Model 2: 3 free parameters:  $p_l, t_l^A$  and  $c$ . Model 3: 4 free parameters:  $p_l, t_l^A, c$  and  $t_l^Q$ . Model 4: as Model 1 (2 free parameters) with  $d_l = d_h = 0$ . Model 5: 4 free parameters:  $p_l, t_l^A, c_l$  and  $c_h$ . Model 6: 2 free parameters:  $p_l$  and  $c$ . Model 7: 2 free parameters:  $p_l$  and  $t_l^Q$ . For details see Supplementary Material. **B** Identifiability analysis for chemotherapeutic kill rate  $c$  and leukemic activation rate  $t_l^A$ , used as free parameters in model 2 and 3, using the profile likelihood.  $\mathbf{x}$  indicates starting parameter combination. The red line close to the  $\mathbf{x}$  indicates the identifiability threshold. As the area of this threshold is open to at least one side, the parameters are not identifiable.

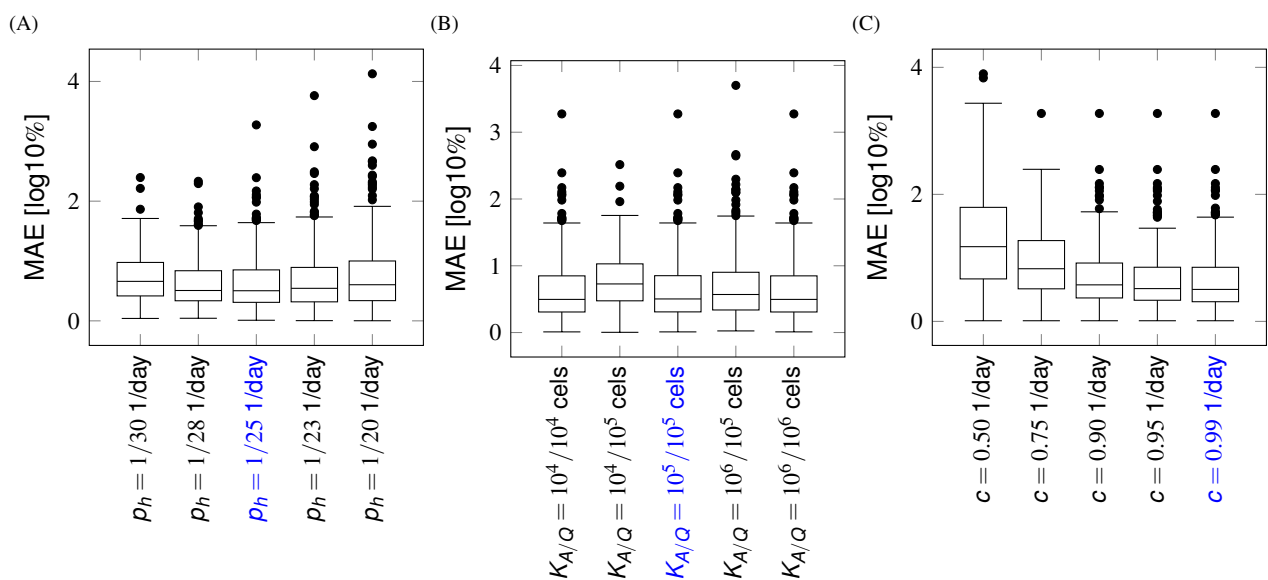

Figure S6: **A** Comparison of boxplots of the mean absolute error (MAE) in log10% for all patient fits for different values of the proliferation rate of healthy cells ( $p_h$ ). Baseline value is marked blue. **B** Comparison of boxplots of the MAE in log10% for all patient fits for different values of the carrying capacities of the active ( $K_A$ ) and the quiescent state ( $K_Q$ ). Baseline value is marked blue. **C** Comparison of boxplots of the MAE in log10% for all patient fits for different values of the chemotherapeutic kill rate  $c$ . Baseline value is marked blue. For details see Supplementary Material.

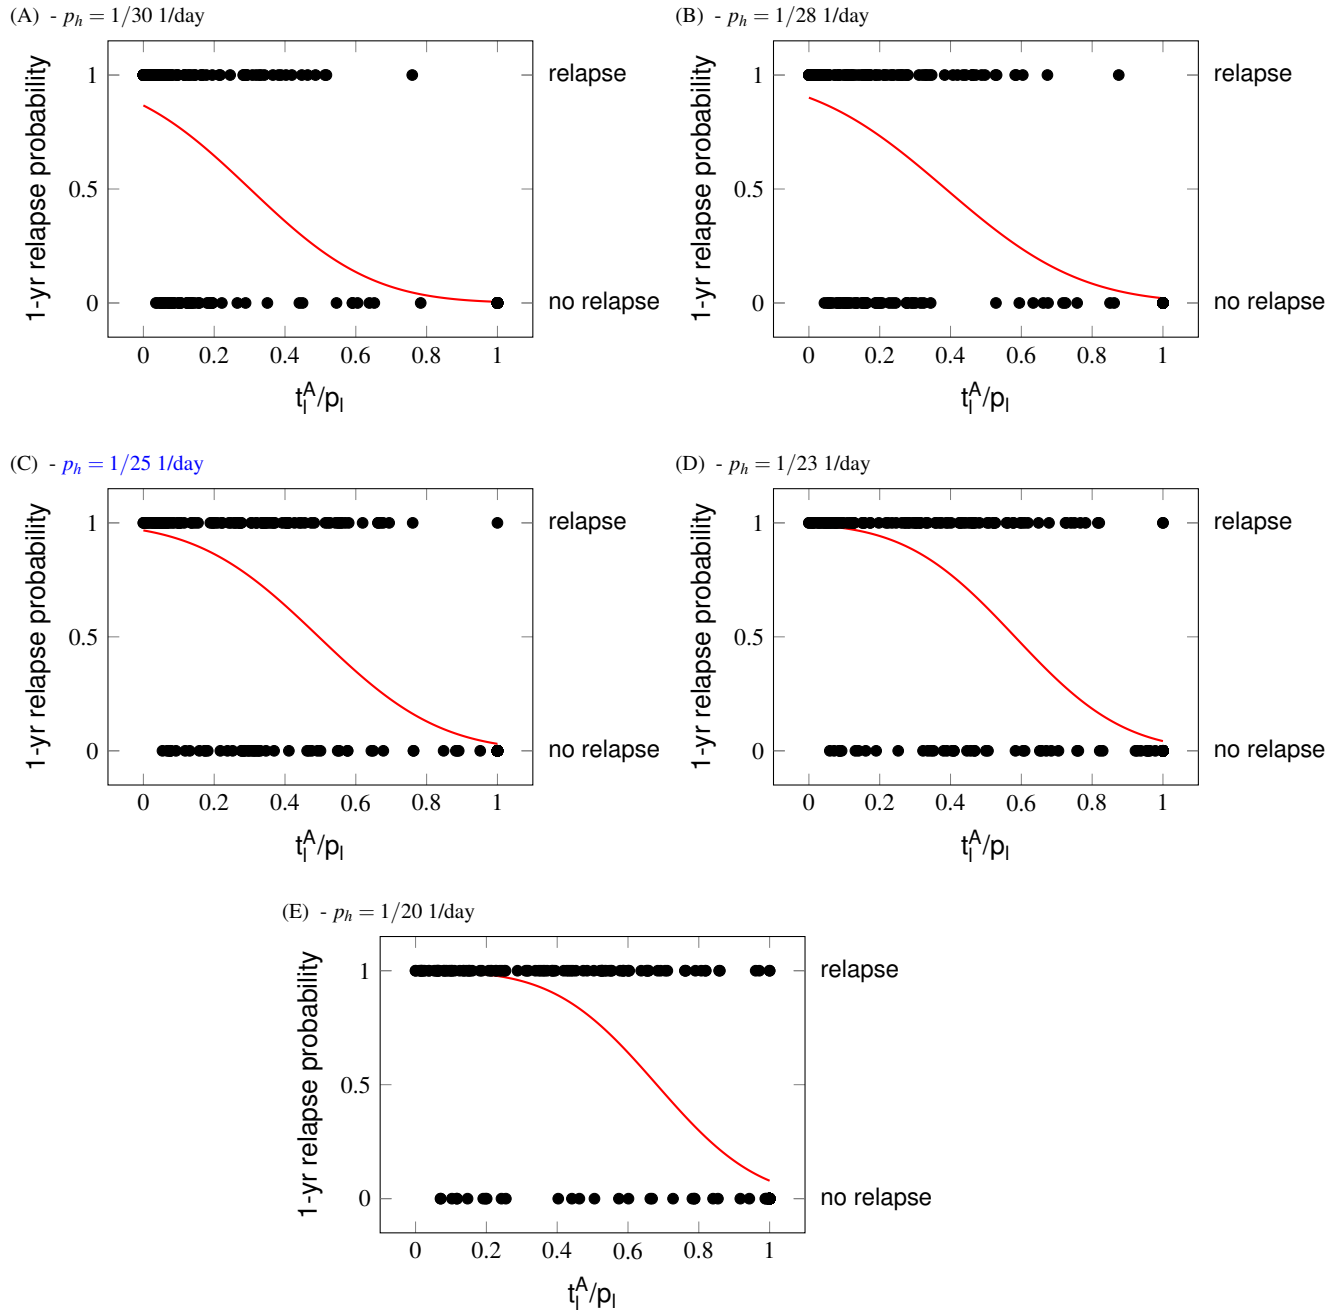

Figure S7: Comparison of 1-year relapse probability (sigmoid function) as estimated by a logistic regression for different values of the proliferation rate of healthy cells ( $p_h$ ). Baseline value is marked blue. Corresponding patient data ( $\bullet$ ) indicate the 1-year relapse status (relapse/no relapse) depending on the normalized ratio of the two fitted parameters ( $t_1^A/p_1$ ).
